# Supplementary material for: Jornada y horario: Consecuencias sociales y profesionales
Source: Royal Society of Chemistry journal article supplement (doi:10.1039/c9nr04475b), 2001-01-01
Supplement: c9nr04475b1.pdf [file c9nr04475b1.pdf]

# High Sensitivity Ultraviolet Detection Based on Three-Dimensional Graphene Field Effect Transistors Decorated with TiO<sub>2</sub> NPs

Shasha Li<sup>1</sup>, Weijie Yin<sup>1</sup>, Yuning Li<sup>1</sup>, Jingye Sun<sup>1</sup>, Mingqiang Zhu<sup>1</sup>, Zewen Liu<sup>2</sup> and Tao Deng<sup>1,2\*</sup>

<sup>1</sup>School of Electronic and Information Engineering, Beijing Jiaotong University, Beijing 100044, China

<sup>2</sup>Institute of Microelectronics, Tsinghua University, Beijing, 100084, China

\* [dengtao@bjtu.edu.cn](mailto:dengtao@bjtu.edu.cn)

## Supplementary Materials

### 1. The detailed fabrication process of the 3D GFETs decorated with TiO<sub>2</sub> NPs

The detailed fabrication process of the three-dimensional (3D) graphene field-effect transistor (GFET) decorated with TiO<sub>2</sub> NPs is shown below point by point (**Figure S1**):

- (a) After a 15-minute dip in H<sub>2</sub>O<sub>2</sub> and H<sub>2</sub>SO<sub>4</sub> solution (volume ratio 1:4) at 85 °C, the Si wafer was rinsed with deionized water and dried with N<sub>2</sub> gas. Magnetron sputtering and lift-off processes were conducted successively to pattern the 50-nm-thick Al sacrificial layer.
- (b) The strained SiN<sub>x</sub> layers were deposited on the Al sacrificial layer by a STS mixed frequency nitride plasma-enhanced chemical vapor deposition (PECVD) system, which consisted of a compressive strained SiN<sub>x</sub> layer at the bottom and a tensile strained SiN<sub>x</sub> layer on the top, with thicknesses of 120 nm and 80 nm, respectively. After the deposition step, reactive ion etching (RIE) process was performed to pattern the strained SiN<sub>x</sub> layers.
- (c) Magnetron sputtering and lift-off processes were performed to pattern the Cr/Au (thicknesses of 10 nm/30 nm) gate electrode on the strained SiN<sub>x</sub> layers.
- (d) A layer of SiO<sub>2</sub> with the thickness of 30 nm was deposited on the gate electrode to realize a buried-gate structure, using PECVD process. Then, RIE etching process was conducted to pattern the dielectric layer.
- (e) A monolayer graphene was transferred onto the top of the dielectric layer. Then, O<sub>2</sub> plasma etching process was performed to pattern the graphene layer.
- (f) Electron beam evaporation and lift-off processes were conducted to pattern the Cr/Au (thicknesses of 10 nm/50 nm) source and drain electrodes on top of the graphene layer.

Within this step, the planar (two-dimensional, 2D) buried-gated GFET was obtained.

- (g) Upon selective etching of the Al sacrificial layer using  $\text{FeCl}_3$  solution, the highly strained  $\text{SiN}_x$  layers rolled the 2D GFET into a 3D tubular architecture.
- (h) After being rinsed in deionized water and dried out naturally, the 3D GFET was obtained.
- (i) The  $\text{TiO}_2$  NPs are deposited on graphene conductive channel by introducing the  $\text{TiO}_2$  NPs solution at one end of the tubular 3D GFET, and it would be sucked into the hollow-core tube towards the graphene conductive channel region, due to the large capillary force.
- (j) After being dried out in the air, the 3D GFETs decorated with  $\text{TiO}_2$  NPs were obtained.

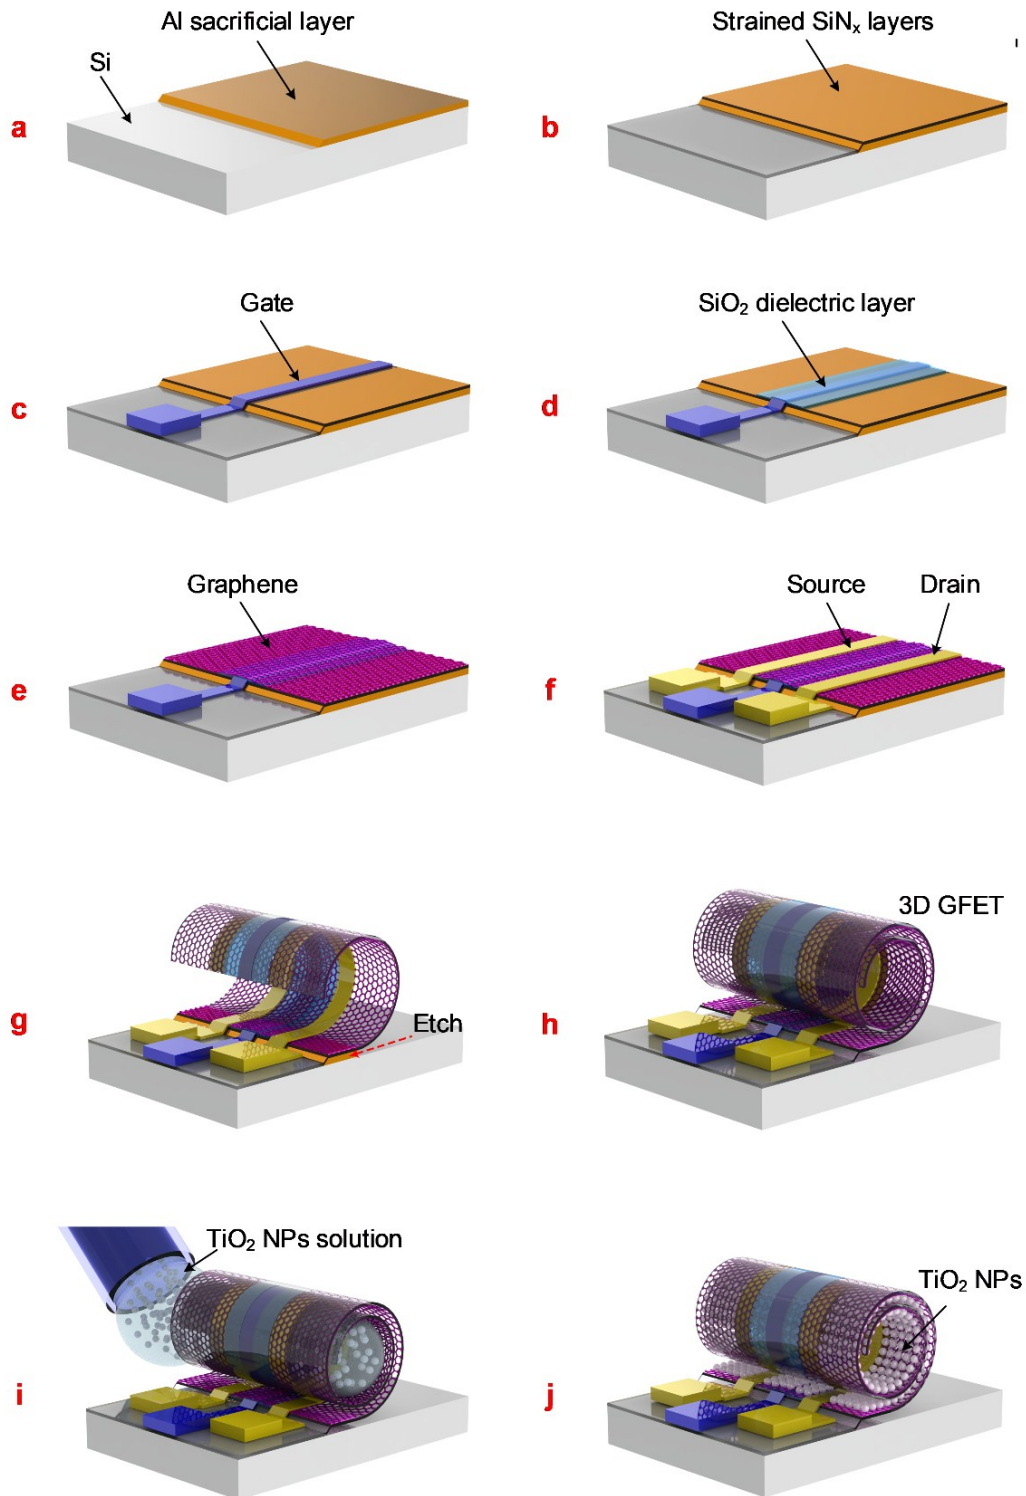

**Figure S1** The fabrication process of 3D GFETs with TiO<sub>2</sub> NPs decoration. (a) Sputter Al sacrificial layer on Si substrate. (b) Deposit strained SiN<sub>x</sub> layers. (c) Sputter Cr/Au gate electrode. (d) Deposit SiO<sub>2</sub> dielectric layer. (e) Transfer and pattern the monolayer graphene. (f) Evaporate Cr/Au source and drain electrodes. (g) Selectively etch the Al sacrificial layer. (h) Rinse and dry

out the 3D GFET. (i) Decorate the 3D GFET with TiO<sub>2</sub> NPs. (j) Dry out the TiO<sub>2</sub> NPs decorated 3D GFET in the air.

## 2. EDS spectra of the TiO<sub>2</sub> NPs decorated 3D GFET

The energy dispersive X-ray spectroscopy (EDS, Quanta 200 ESEM FEG, FEI, OR, USA) was employed to confirm the existence of TiO<sub>2</sub> in the conductive channel of the 3D GFETs with TiO<sub>2</sub> NPs decoration. As shown in **Fig. S2b-S2d**, the O and Ti elements were detected at different positions of the conductive channel of the device labeled by red boxes in **Fig. S2a**. These results verify not only the existence of the TiO<sub>2</sub> NPs but also the distribution of the TiO<sub>2</sub> NPs throughout the conductive channel. The Cl element was from the TiCl<sub>4</sub> solution, which was used in the preparation process of TiO<sub>2</sub> NPs with a sol-gel method [1].

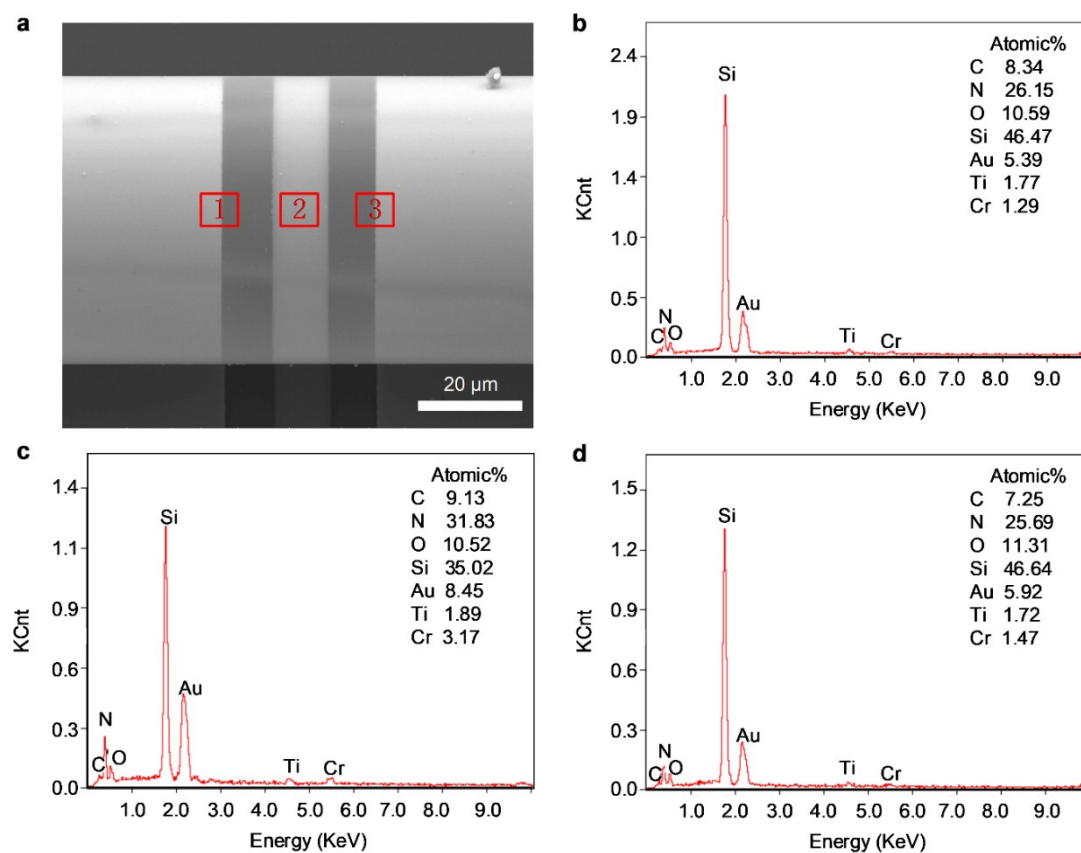

**Figure S2 EDS spectra of the conductive channel of the 3D GFET with TiO<sub>2</sub> NPs decoration.**

(a) Zoomed-in details of the graphene conductive channel. (b)-(d) The EDS spectra of the

conductive channel of the 3D GFET with TiO<sub>2</sub> NPs decoration, at different positions labeled 1, 2 and 3 in (a), respectively.

### 3. The field effect mobility and metal-graphene contact resistance of the 3D GFET without and with TiO<sub>2</sub> NPs decoration

The transfer characteristics of the 3D GFET without and with TiO<sub>2</sub> NPs decoration were measured at room temperature and under ambient conditions. Figure S3 shows the total resistance ( $R_{\text{total}}$ ) of the 3D GFET before and after coating TiO<sub>2</sub> NPs as a function of gate voltage ( $V_{\text{gs}}$ ) at a source-drain bias ( $V_{\text{ds}}$ ) of 1 V. In order to obtain the carrier mobility ( $\mu$ ) and contact resistance ( $R_{\text{contact}}$ ) from the measured data of **Fig. S3**, we adopt a model proposed by Kim *et al.* [2] to analyze the resistive behavior of the 3D GFETs without and with TiO<sub>2</sub> NPs decoration. The  $R_{\text{total}}$  profiles can be fitted to the equation [2]

$$R_{\text{total}} = R_{\text{contact}} + R_{\text{channel}} = R_{\text{contact}} + \frac{1}{\mu e} \frac{L}{\sqrt{n_0^2 + n^2} W} \quad (1)$$

where  $R_{\text{channel}}$  is the resistance of the graphene channel,  $L$  and  $W$  are the length and width of the graphene channel, respectively,  $e$  is the electronic charge,  $n_0$  is the density of carriers at the maximum resistance (Dirac point), and  $n$  is the gate voltage modulated carrier concentration. By fitting this model to the measured data in **Fig. S3**, we can extract the  $\mu$  and  $R_{\text{contact}}$ . For the 3D GFET without TiO<sub>2</sub> NPs decoration (**Fig. S3a**),  $\mu = 1640 \text{ cm}^2 \text{ V}^{-1} \text{ s}^{-1}$ , and  $R_{\text{contact}} = 158 \text{ } \Omega$ . The mobility of the 3D GFET without TiO<sub>2</sub> NPs decoration is comparable with that of reported 3D GFETs [3]. After coating TiO<sub>2</sub> NPs on the 3D GFETs, the extracted carrier mobility decreases to  $\mu = 1572 \text{ cm}^2 \text{ V}^{-1} \text{ s}^{-1}$ , and the contact resistance increases to  $R_{\text{contact}} = 260 \text{ } \Omega$ , as shown in **Fig. S3b**. These changes can be attributed to increased disorder caused by

perturbations to the graphene surface during the coating process [4,5].

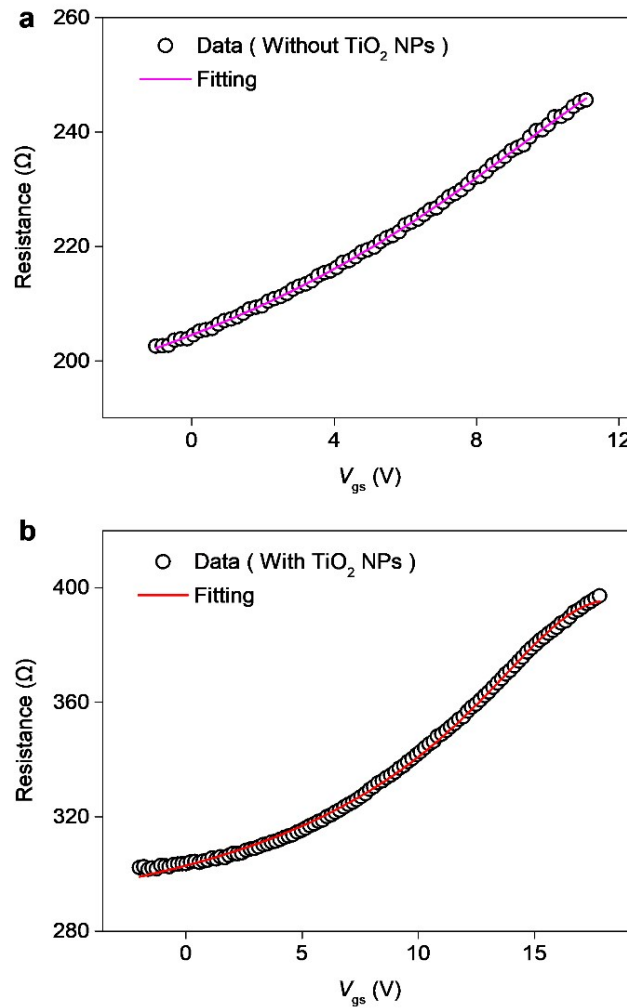

**Figure S3** The resistances of the 3D GFET before and after the  $\text{TiO}_2$  NPs decoration process. The resistance versus the gate voltage ( $V_g$ ) along with fitting results for 3D GFETs without (a) and with (b)  $\text{TiO}_2$  NPs decoration.

#### **4. Simulation of the optical fields of the 3D GFET and 2D GFET with $\text{TiO}_2$ NPs decoration**

The distribution of the electric field magnitude near the 3D GFET and 2D GFET with  $\text{TiO}_2$  NPs decorations under 325-nm incident light illumination were simulated using the commercial FEM software Comsol Multiphysics. The 3D rolled-up microcavity was designed in the simulation to ensure that it matched the actual fabricated device as closely as possible.

The microcavity consisted of a 0.335-nm-thick graphene layer, a 30-nm-thick SiO<sub>2</sub> dielectric layer, a 200-nm-thick SiN<sub>x</sub> strained layer and a layer of TiO<sub>2</sub> NPs with a diameter of 100 nm. Under the illumination of 325-nm light (laser), the graphene membrane was described using the complex refractive index  $n(\lambda) = 3.0 + i(C_1/3)\lambda$ , where  $C_1 = 5.446 \mu\text{m}^{-1}$  and  $\lambda$  is the wavelength. The SiN<sub>x</sub> and SiO<sub>2</sub> layers were modelled as lossless dielectric materials, with refractive indices as shown in **Table S1**.

**Table S1 Detailed device structure for simulation**

| Material             | Thickness / diameter (nm) | Refractive index          | Bandgap (eV) | Comment            |
|----------------------|---------------------------|---------------------------|--------------|--------------------|
| SiN <sub>x</sub>     | 200                       | 1.87                      | 5.1          | Strained layers    |
| SiO <sub>2</sub>     | 30                        | 1.45                      | 8.9          | Dielectric layer   |
| TiO <sub>2</sub> NPs | 100                       | 2.76                      | 3.2          | Light harvesters   |
| Graphene             | 0.335                     | $\frac{C_1}{3+i3\lambda}$ | 0            | Conductive channel |

$C_1 = 5.446 \mu\text{m}^{-1}$ ,  $\lambda$  is the wavelength.

## Reference

- [1] M. Zhu, L. Zhang, X. M. Li, Y. J. He, X. Li, F. M. Guo, X. B. Zang, K. L. Wang, D. Xie, X. H. Li, B. Q. Wei and H. W. Zhu, *J. Mater. Chem. A*, 2015, **3**, 8133.
- [2] S. Kim, J. Nah, I. Jo, D. Shahrjerdi, L. Colombo, Z. Yao, E. Tutuc and S. K. Banerjee, *Applied Physics Letters*, 2009, **94**, 062107.
- [3] T. Deng, Z. H. Zhang, Y. X. Liu, Y. X. Wang, F. Su, S. S. Li, Y. Zhang, H. Li, H. J. Chen, Z. R. Zhao, Y. Li and Z. W. Liu, *Nano Letters*, 2019, **19**, 1494.
- [4] D. B. Farmer, H. Y. Chiu, Y. M. Lin, K. A. Jenkins, F. N. Xia and P. Avouris, *Nano Letter*, 2009, **9**, 4474.
- [5] M. Ishigami, J. H. Chen, W. G. Cullen, M. S. Fuhrer and E. D. Williams, *Nano Letter*, 2007,



7, 1643.
